# Supplementary material
Source: MDPI journal article supplement (https://www.mdpi.com/2077-0472/12/5/665)
Supplement: s1 [file s1 › agriculture-1667257-supplementary.pdf]

## A questionnaire for the crop production farm - consumer cereals

Definitions:

\* FOOD - cereals harvested from the field for consumption (for use in the food industry)

\*\*STRATA is cereals which, despite their original purpose, are not saleable for human consumption (for use in the food industry)

|                                                                                                                              |                          |                          |
|------------------------------------------------------------------------------------------------------------------------------|--------------------------|--------------------------|
| 1. address details of the holding:<br>Voivodeship                                                                            |                          | town of                  |
| 2. age group of the holder<br><input type="checkbox"/> 20-40 <input type="checkbox"/> 41-60 <input type="checkbox"/> over 61 |                          |                          |
| 3. for how many years has the owner been cultivating                                                                         |                          |                          |
|                                                                                                                              | 2017                     | 2018                     |
| 4. total area of cultivated agricultural land-<br>(as at the end of the year) [ha]                                           |                          |                          |
| ▪ of which the area under consumer cereals - (as at the end of the year) [ha]                                                |                          |                          |
| 5. cultivation method:                                                                                                       |                          |                          |
| • conventional (not organic)                                                                                                 | <input type="checkbox"/> | <input type="checkbox"/> |
| • ecological (certified)                                                                                                     | <input type="checkbox"/> | <input type="checkbox"/> |
| • mixed                                                                                                                      | <input type="checkbox"/> | <input type="checkbox"/> |
| 6. weight of total consumer cereal harvest, in tonnes per year, of which:                                                    | total.....               | total.....               |
| a) Total major cereals (wheat, barley, rye, triticale)                                                                       | a) .....                 | a) .....                 |
| b) other cereals combined (maize, oats, cereal mixtures, buckwheat, millet and others)                                       | b).....                  | b).....                  |
| 7. other crop and livestock production on the holding - please specify                                                       | .....<br>.....           | .....<br>.....           |
| 8. storage methods for cereals (several options may be selected):                                                            | 2017                     | 2018                     |
| • silos                                                                                                                      | <input type="checkbox"/> | <input type="checkbox"/> |
| • chambers                                                                                                                   | <input type="checkbox"/> | <input type="checkbox"/> |
| • flat storages                                                                                                              | <input type="checkbox"/> | <input type="checkbox"/> |
| • other (e.g. big bag) - please specify                                                                                      | .....<br>.....           | .....<br>.....           |
| • on a dry basis                                                                                                             | <input type="checkbox"/> | <input type="checkbox"/> |
| • in a cooled state                                                                                                          | <input type="checkbox"/> | <input type="checkbox"/> |
| • hermetic tanks                                                                                                             | <input type="checkbox"/> | <input type="checkbox"/> |
| 9. weight of losses** of food grains from storage and other on-farm activities [t]                                           |                          |                          |
| 10. please indicate <u>the reasons for the</u> above losses**:                                                               |                          |                          |
| • soggyiness                                                                                                                 | <input type="checkbox"/> | <input type="checkbox"/> |
| • overgrowth                                                                                                                 | <input type="checkbox"/> | <input type="checkbox"/> |
| • fire                                                                                                                       | <input type="checkbox"/> | <input type="checkbox"/> |
| • mechanical defects                                                                                                         | <input type="checkbox"/> | <input type="checkbox"/> |
| • storage pests                                                                                                              | <input type="checkbox"/> | <input type="checkbox"/> |

|                                          |                          |                          |
|------------------------------------------|--------------------------|--------------------------|
| • mouldy                                 | <input type="checkbox"/> | <input type="checkbox"/> |
| • change in odour                        | <input type="checkbox"/> | <input type="checkbox"/> |
| • other, please specify                  | .....<br>.....           | .....<br>.....           |
| and indicate <u>how they are managed</u> |                          |                          |
| • landfill                               | <input type="checkbox"/> | <input type="checkbox"/> |
| • composting                             | <input type="checkbox"/> | <input type="checkbox"/> |
| • animal feeding                         | <input type="checkbox"/> | <input type="checkbox"/> |
| • biogas plants                          | <input type="checkbox"/> | <input type="checkbox"/> |
| • biofuels                               | <input type="checkbox"/> | <input type="checkbox"/> |
| • other, please specify                  | .....<br>.....           | .....<br>.....           |

| 11. organisation of transport of agricultural products to the recipient (please enter number of transports):  |      |      |
|---------------------------------------------------------------------------------------------------------------|------|------|
|                                                                                                               | 2017 | 2018 |
| ▪ own farm transport                                                                                          |      |      |
| ▪ external transport service (if yes, <i>please specify name of company - optional</i> )                      |      |      |
| ▪ collection by a commercial intermediary (if so, <i>please indicate the name of the company - optional</i> ) |      |      |
| ▪ collection by recipient's transport                                                                         |      |      |

|                                                                                                                                                                                     | 2017                     | 2018                     |
|-------------------------------------------------------------------------------------------------------------------------------------------------------------------------------------|--------------------------|--------------------------|
| 12. total weight of deliveries of consumer cereals not accepted by the customer due to inadequate quality parameters, [t] ( <i>not including losses incurred during transport</i> ) |                          |                          |
| and indicate <u>how they are managed</u>                                                                                                                                            |                          |                          |
| • landfill                                                                                                                                                                          | <input type="checkbox"/> | <input type="checkbox"/> |
| • composting                                                                                                                                                                        | <input type="checkbox"/> | <input type="checkbox"/> |
| • animal feeding                                                                                                                                                                    | <input type="checkbox"/> | <input type="checkbox"/> |
| • biogas plants                                                                                                                                                                     | <input type="checkbox"/> | <input type="checkbox"/> |
| • biofuels                                                                                                                                                                          | <input type="checkbox"/> | <input type="checkbox"/> |
| • other, please specify                                                                                                                                                             | .....<br>.....           | .....<br>.....           |

Please fill in the following table only for own transport, for consumer cereals

|                                                                                          | 2017                     | 2018                     |
|------------------------------------------------------------------------------------------|--------------------------|--------------------------|
| 13. total weight of losses** of consumer cereals during transport to the consignee, [t]. |                          |                          |
| 14. Please give <u>reasons for the above losses**</u> :                                  |                          |                          |
| • sogginess                                                                              | <input type="checkbox"/> | <input type="checkbox"/> |

|                                          |                          |                          |
|------------------------------------------|--------------------------|--------------------------|
| • inadequate quality parameters          | <input type="checkbox"/> | <input type="checkbox"/> |
| • mechanical defects                     | <input type="checkbox"/> | <input type="checkbox"/> |
| • other, please specify                  | .....<br>.....           | .....<br>.....           |
| and indicate <u>how they are managed</u> |                          |                          |
| • landfill                               | <input type="checkbox"/> | <input type="checkbox"/> |
| • composting                             | <input type="checkbox"/> | <input type="checkbox"/> |
| • animal feeding                         | <input type="checkbox"/> | <input type="checkbox"/> |
| • biogas plants                          | <input type="checkbox"/> | <input type="checkbox"/> |
| • biofuels                               | <input type="checkbox"/> | <input type="checkbox"/> |
| • other, please specify                  | .....<br>.....           | .....<br>.....           |
